# Supplementary material
Source: PubMed Central journal article supplement (PMC6743319)

A. **Adjusted Hazard Ratios (HR) for first delivered shock/ATP of any type**

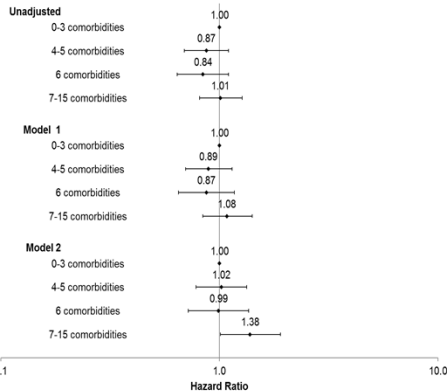

B. **Adjusted Hazard Ratios (HR) for first inappropriate delivered shock/ATP**

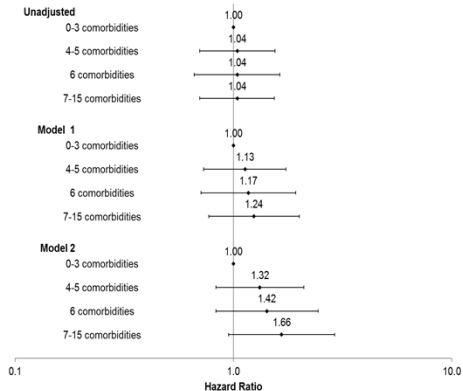

C. **Adjusted Hazard Ratios (HR) for first appropriate delivered shock/ATP**

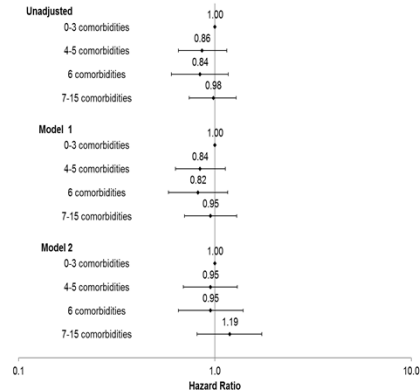

Supplement: NIHMS1045191-supplement-SA2.pdf [file NIHMS1045191-supplement-SA2.pdf]
