# Supplementary material
Source: PubMed Central journal article supplement (PMC6743319)

A. Adjusted Relative Risk Results (RR) for Risk of Total Shocks/ATP

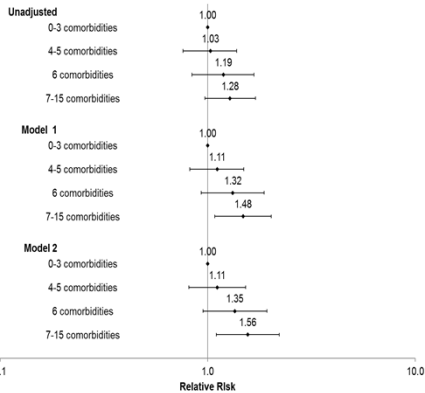

B. Adjusted Relative Risk Results (RR) for Risk of Total Inappropriate Shocks/ATP

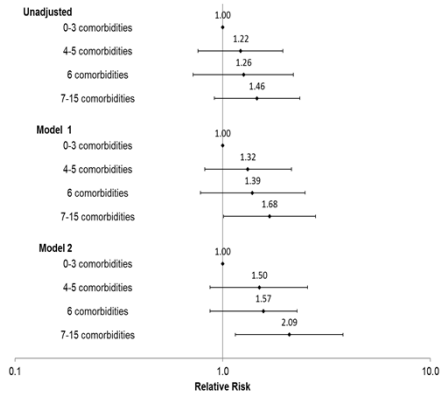

C. Adjusted Relative Risk Results (RR) for Risk of Total Appropriate Shocks/ATP

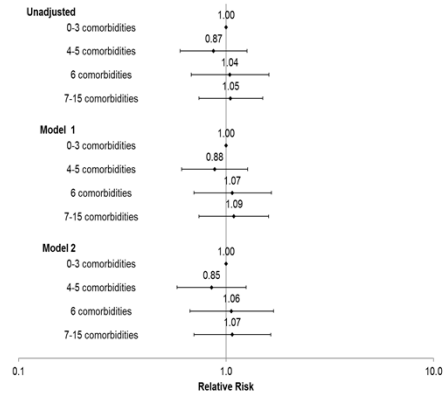

Supplement: NIHMS1045191-supplement-SA3.pdf [file NIHMS1045191-supplement-SA3.pdf]
