# Supplementary material
Source: PubMed Central journal article supplement (PMC6743319)
Supplement: NIHMS1045191-supplement-SA4.pdf [file NIHMS1045191-supplement-SA4.pdf]

**Unadjusted**

0-3 comorbidities  
4-5 comorbidities  
6 comorbidities  
7-15 comorbidities

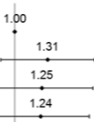**Model 1**

0-3 comorbidities  
4-5 comorbidities  
6 comorbidities  
7-15 comorbidities

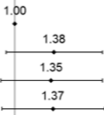**Model 2**

0-3 comorbidities  
4-5 comorbidities  
6 comorbidities  
7-15 comorbidities

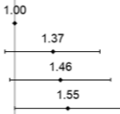

Relative Risk

0.1

1.0

10.0
