# Supplementary material
Source: PubMed Central journal article supplement (PMC6743319)

A. Adjusted Hazard Ratios (HR) for first delivered shock

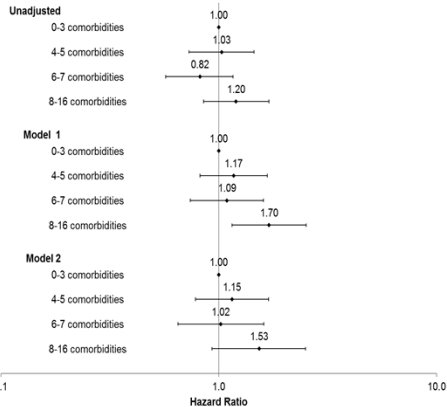

B. Adjusted Hazard Ratios (HR) for first inappropriate delivered shock

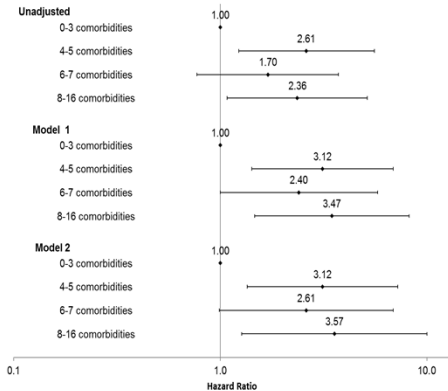

C. Adjusted Hazard Ratios (HR) for first appropriate delivered shock

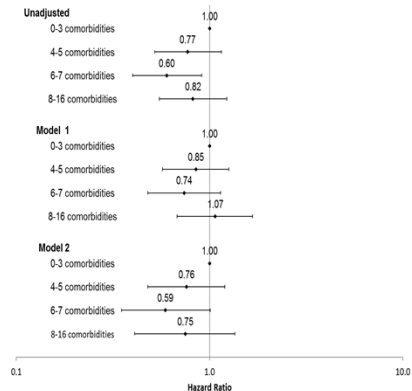

Supplement: NIHMS1045191-supplement-SB2.pdf [file NIHMS1045191-supplement-SB2.pdf]
