# Supplementary material
Source: PubMed Central journal article supplement (PMC6743319)

A. Adjusted Relative Risk Results (RR) for Risk of Total Shocks

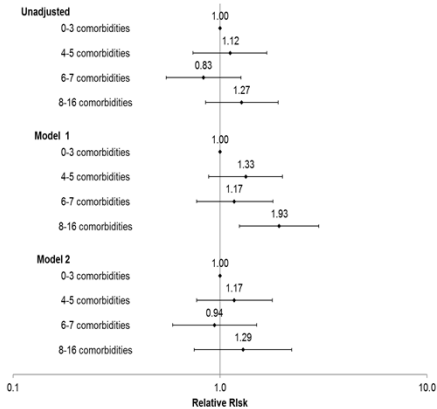

B. Adjusted Relative Risk Results (RR) for Risk of Total Inappropriate Shocks

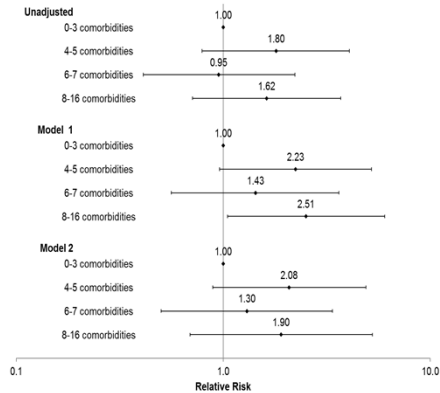

C. Adjusted Relative Risk Results (RR) for Risk of Total Appropriate Shocks

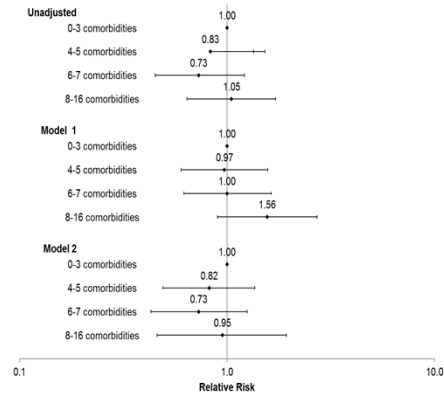

Supplement: NIHMS1045191-supplement-SB3.pdf [file NIHMS1045191-supplement-SB3.pdf]
