# Supplementary material
Source: PubMed Central journal article supplement (PMC6743319)
Supplement: NIHMS1045191-supplement-SB4.pdf [file NIHMS1045191-supplement-SB4.pdf]

**Unadjusted**

0-3 comorbidities

1.00

4-5 comorbidities

1.60

6-7 comorbidities

1.04

8-16 comorbidities

1.17

**Model 1**

0-3 comorbidities

1.00

4-5 comorbidities

1.67

6-7 comorbidities

1.13

8-16 comorbidities

1.23

**Model 2**

0-3 comorbidities

1.00

4-5 comorbidities

1.98

6-7 comorbidities

1.23

8-16 comorbidities

1.76

Relative Risk

0.1

1.0

10.0
