# Supplementary material
Source: PubMed Central journal article supplement (PMC6743319)

A. Adjusted Relative Risk Results (RR) for Risk of Total ATP

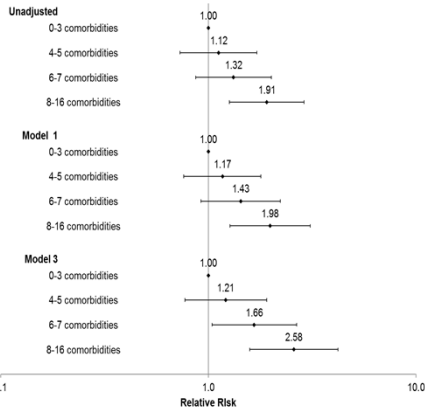

B. Adjusted Relative Risk Results (RR) for Risk of Total Inappropriate ATP

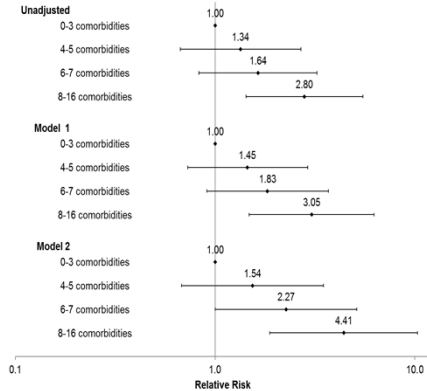

C. Adjusted Relative Risk Results (RR) for Risk of Total Appropriate ATP

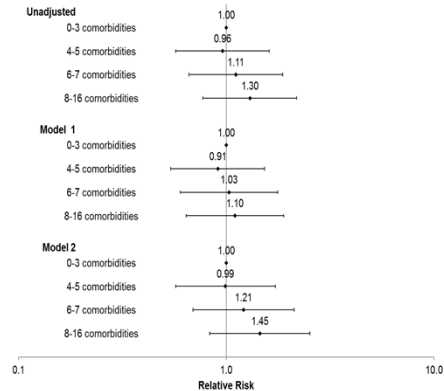

Supplement: NIHMS1045191-supplement-SC3.pdf [file NIHMS1045191-supplement-SC3.pdf]
