# Supplementary material
Source: PubMed Central journal article supplement (PMC6743319)
Supplement: NIHMS1045191-supplement-SC4.pdf [file NIHMS1045191-supplement-SC4.pdf]

**Unadjusted**

0-3 comorbidities  
4-5 comorbidities  
6-7 comorbidities  
8-16 comorbidities

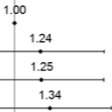**Model 1**

0-3 comorbidities  
4-5 comorbidities  
6-7 comorbidities  
8-16 comorbidities

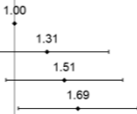**Model 2**

0-3 comorbidities  
4-5 comorbidities  
6-7 comorbidities  
8-16 comorbidities

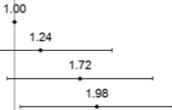

0.1

1.00

10.0

**Relative Risk**
