# Supplementary material
Source: PubMed Central journal article supplement (PMC6743319)

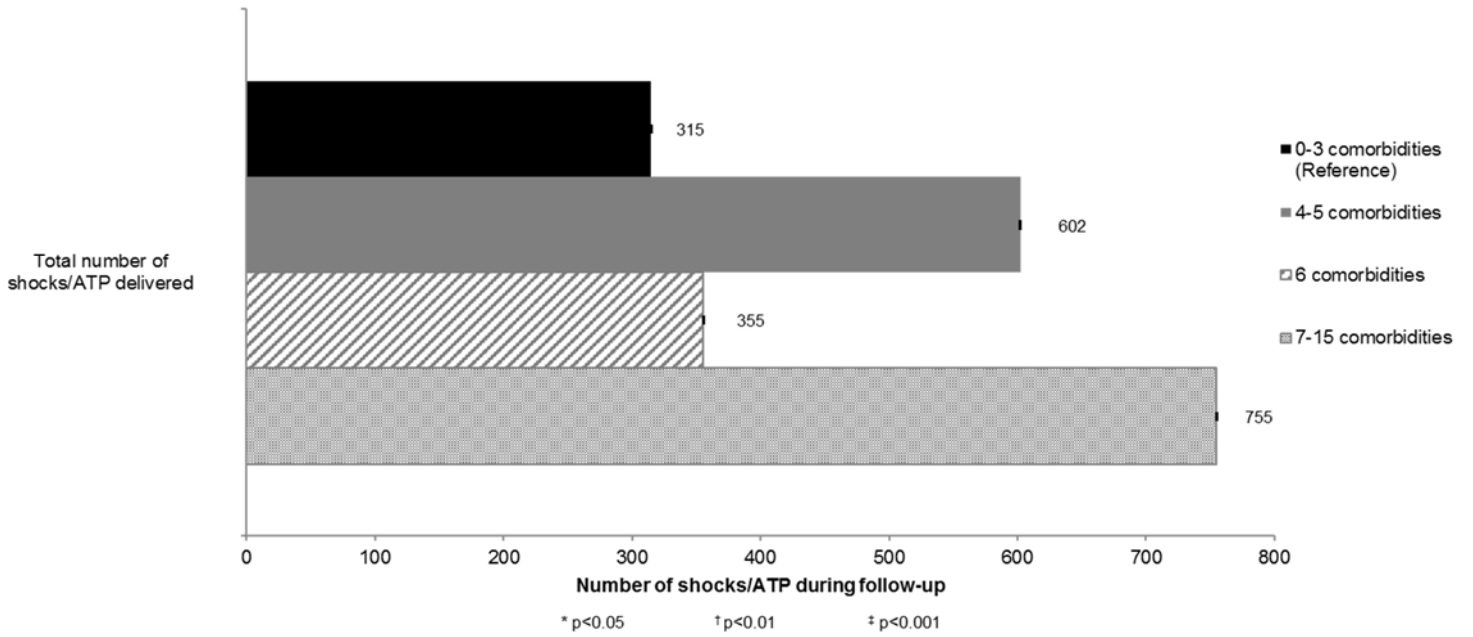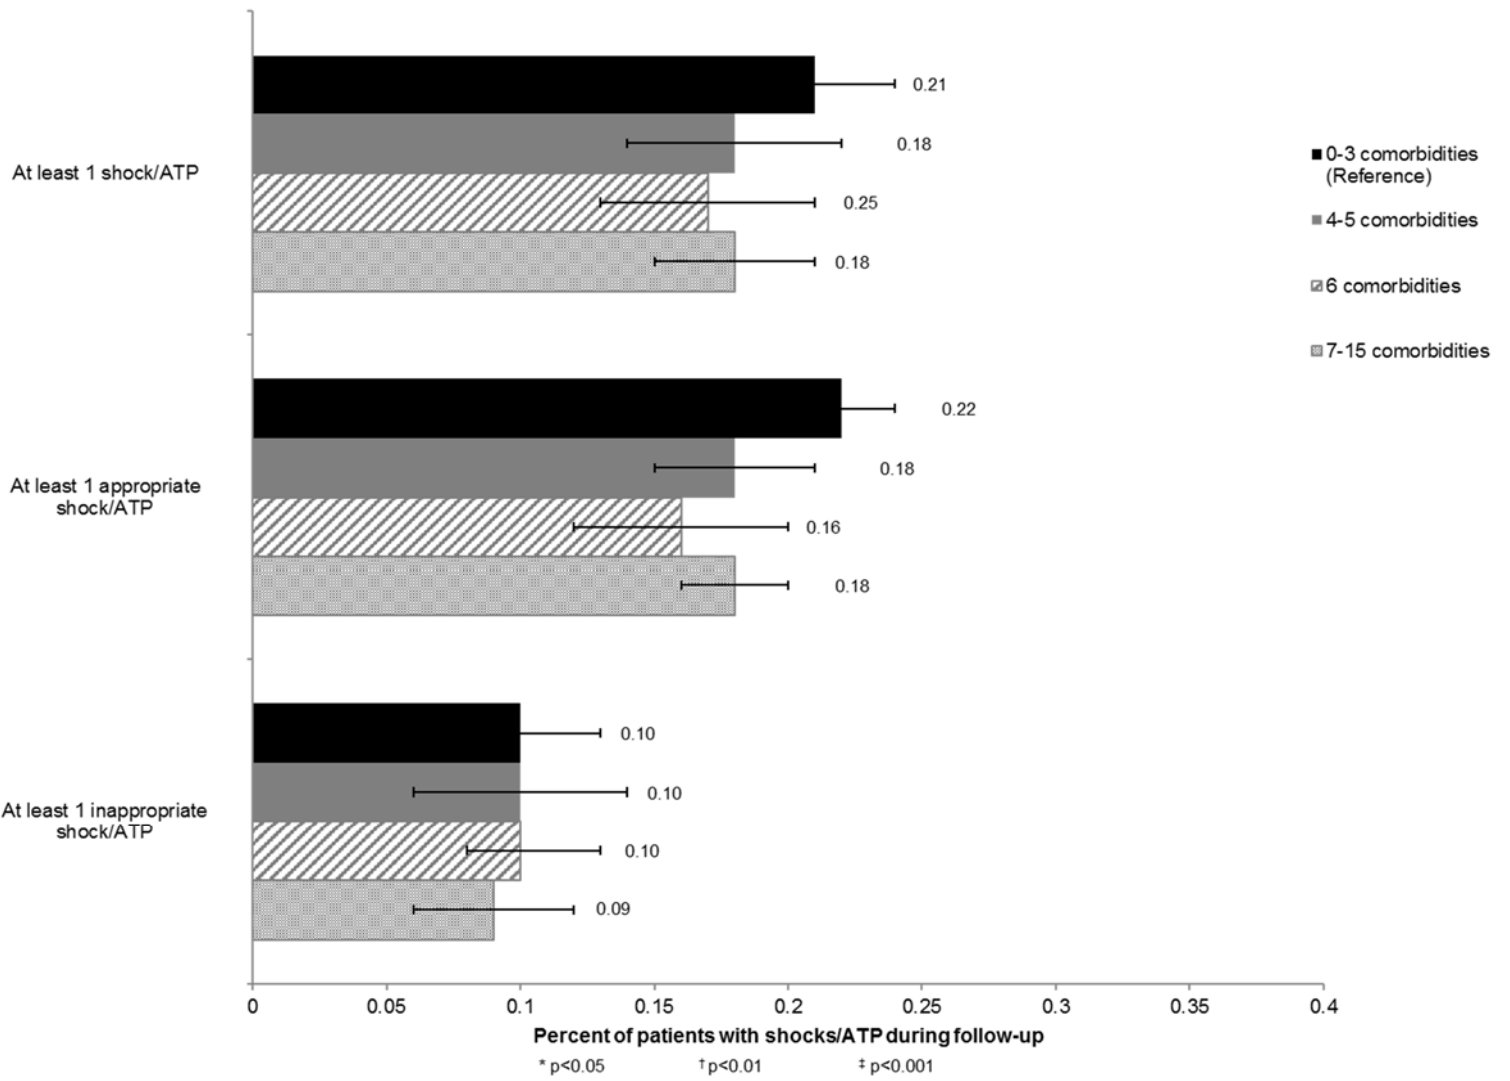

Supplement: NIHMS1045191-supplement-SA1.pdf [file NIHMS1045191-supplement-SA1.pdf]

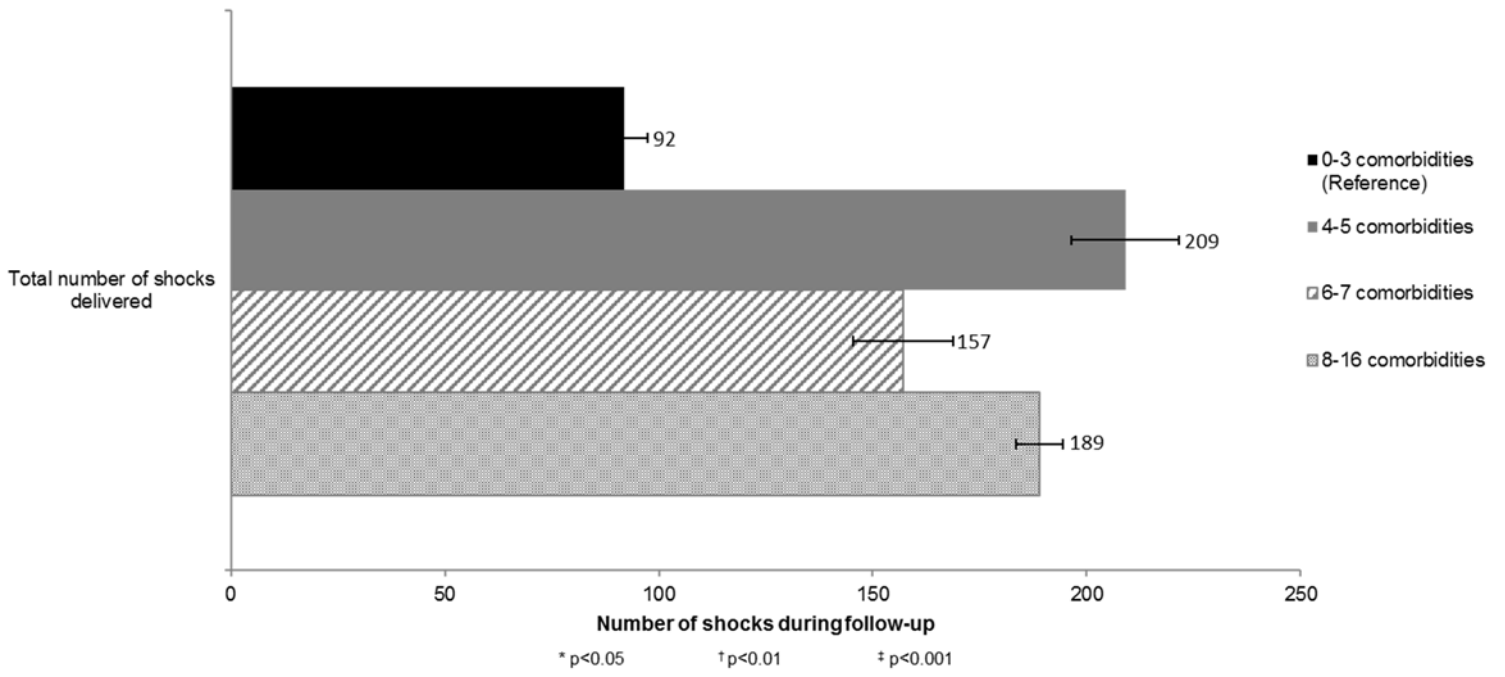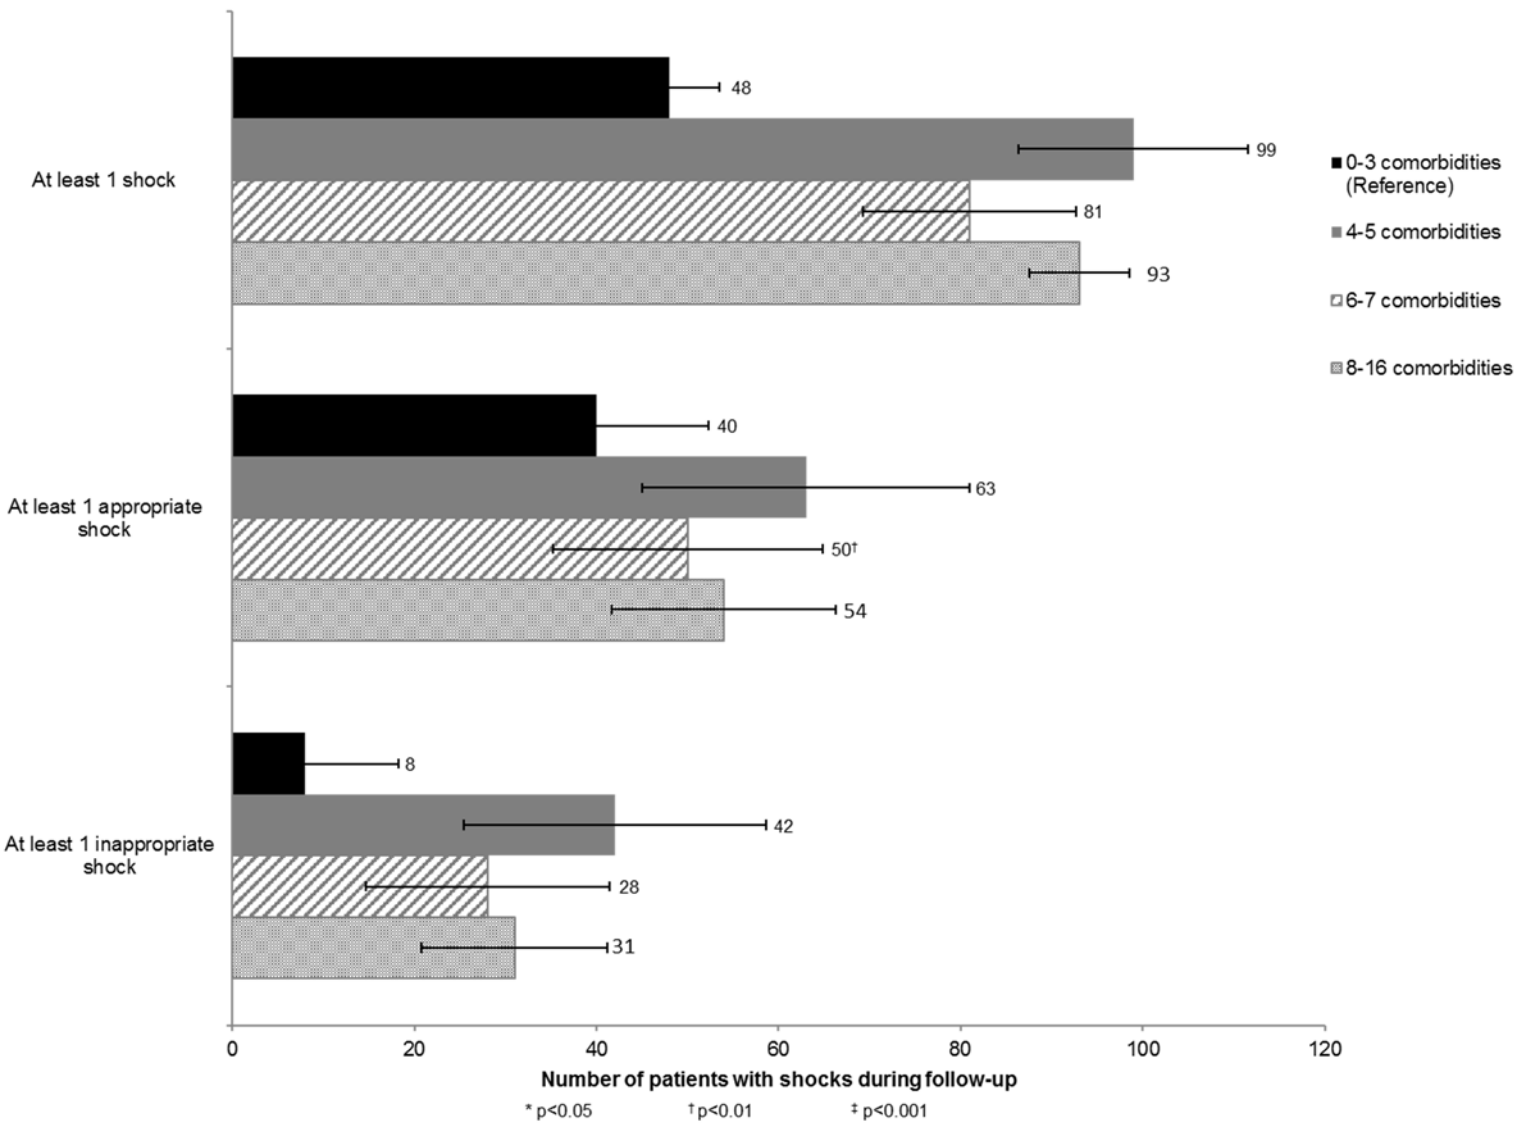

Supplement: NIHMS1045191-supplement-SB1.pdf [file NIHMS1045191-supplement-SB1.pdf]

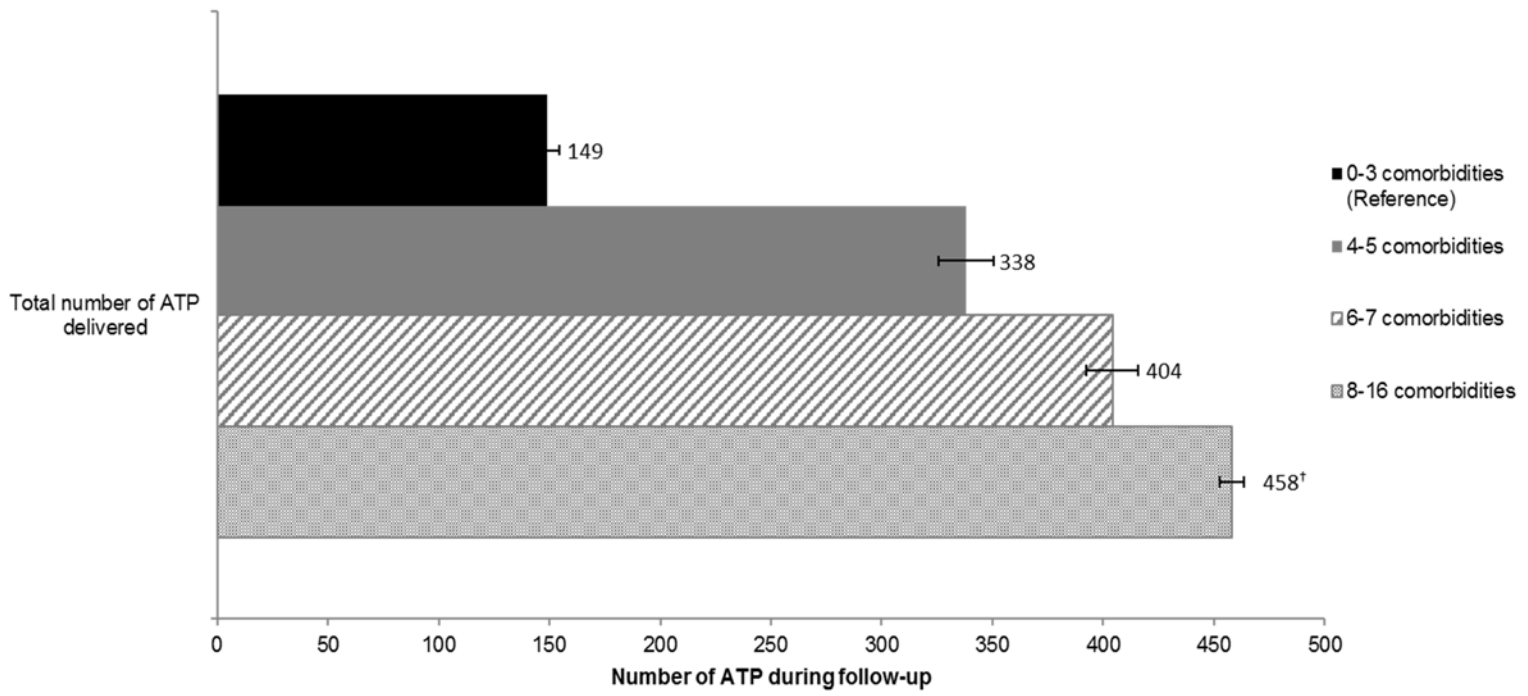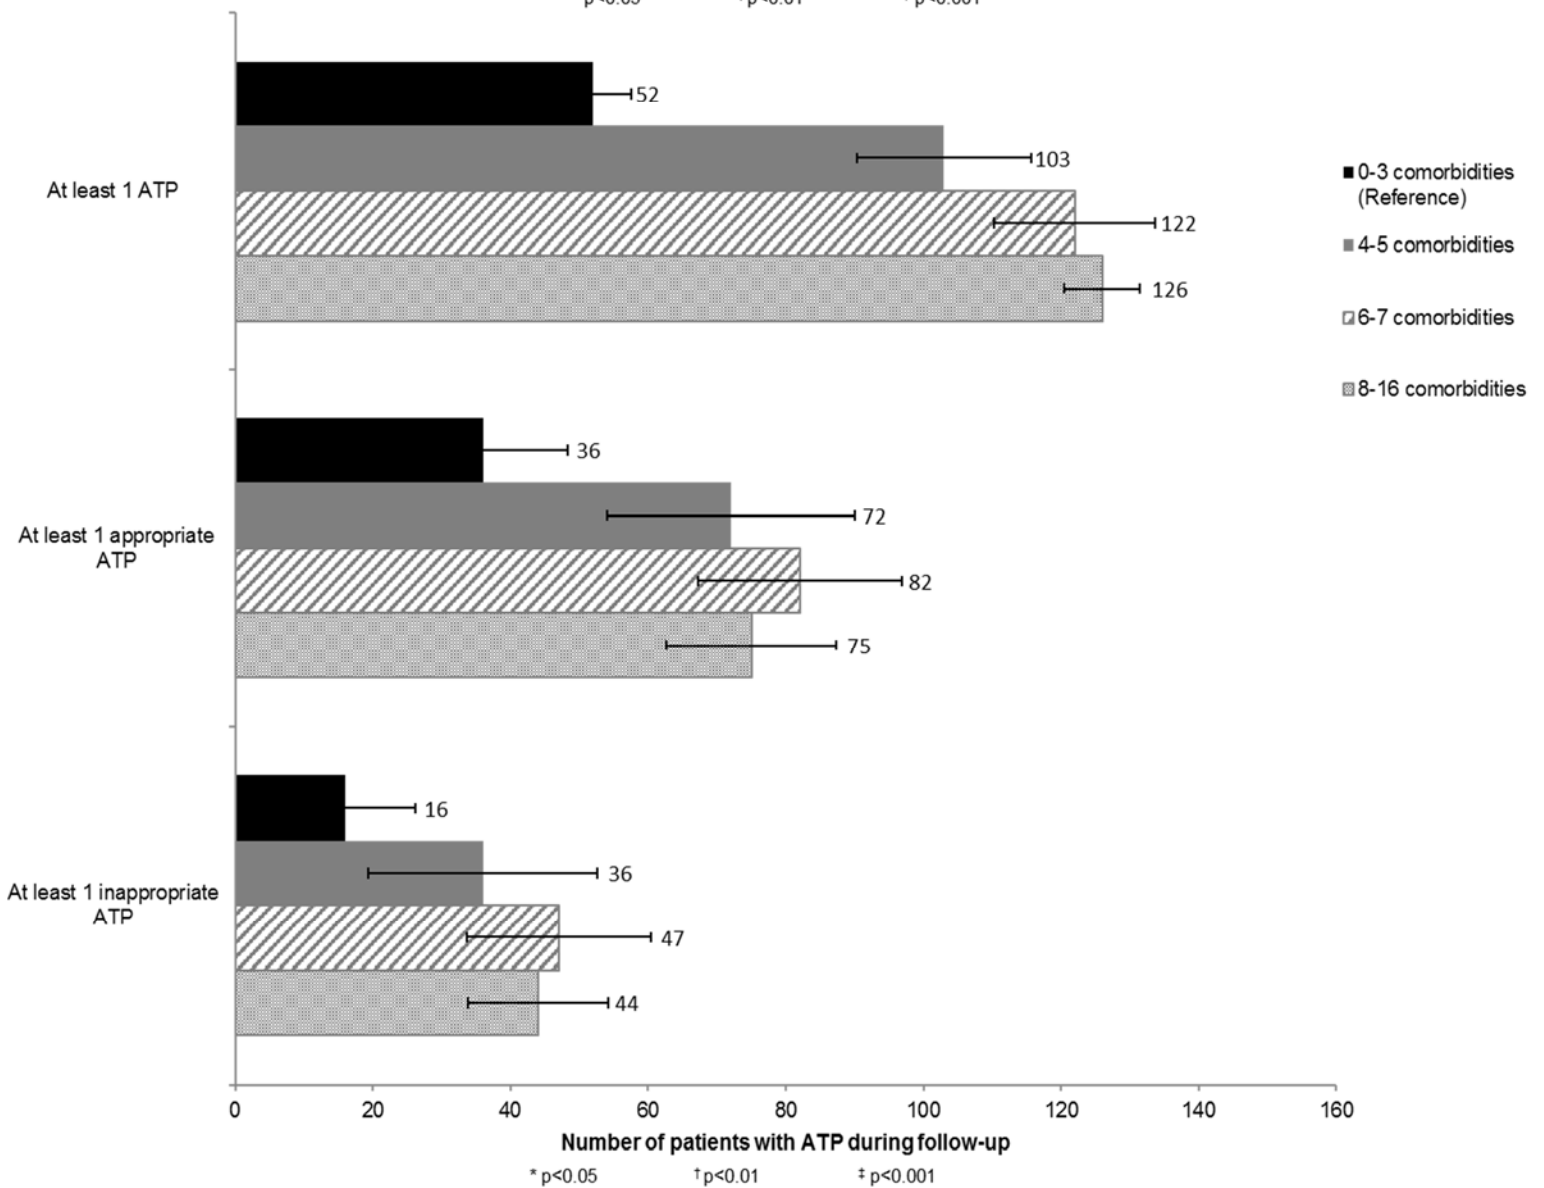

Supplement: NIHMS1045191-supplement-SC1.pdf [file NIHMS1045191-supplement-SC1.pdf]
